# Supplementary material
Source: publisher figshare collection journal article supplement (https://acs.figshare.com/ndownloader/files/9311131)
Supplement: Supplementary file 1 [file 9311131]

## Sheet: Sheet1
Low Focal Adhesion Signaling Promotes Ground State Pluripotency of Mouse Embryonic Stem Cells
Sara Taleahmad, Mehdi Mirzaei, Azam Samadian, Seyedeh-Nafiseh Hassani, Paul A. Haynes, Ghasem Hosseini Salekdeh, Hossein Baharvand.
Supplementary Table S5. Primary and secondary antibodies used for immunocytochemistry and Western blot analyses.
Antibodies	Clones	Company	Cat. no.	Host
Primary antibodies
Fibronectin	Polyclonal	abcam	ab2413	Rabbit
Laminin	Polyclonal	abcam	ab30320	Rabbit
Actin	Polyclonal	abcam	ab7817	Mouse
Cdh1	Monoclonal	Santa Cruz	sc7870	Rabbit
Pou5f1	Monoclonal	Santa Cruz	sc-5279	Mouse
Nanog	Polyclonal	abcam	ab184609	Mouse
FAK	Polyclonal	Santa Cruz	sc-558	Rabbit
Phospho-FAK	Monoclonal	Cell Signaling	05-1140	Rabbit
Erk1/2	Polyclonal	abcam	ab17942	Rabbit
Phospho-Erk1/2	Polyclonal	Santa Cruz	sc-16981-R	Rabbit
GAPDH	Monoclonal	GeneTex	GTX30666	Mouse
Secondary antibodies
Goat anti-mouse IgG-Alexa Fluor 568	Polyclonal	Thermo	A-11004	Goat IgG
Goat anti-mouse IgG-Alexa Fluor 488	Polyclonal	Thermo	A-11001	Goat IgG
Donkey anti-rabbit IgG-Alexa Fluor 546	Polyclonal	Invitrogen	A-10040	Donkey IgG
Donkey anti-rabbit IgG-Alexa Fluor 488	Polyclonal	Invitrogen	A-21206	Donkey IgG
